# Supplementary material for: Inhibition of PI3K/AKT/mTOR axis disrupts oxidative stress-mediated survival of melanoma cells
Source: PubMed Central journal article supplement (PMC4466678; doi:10.18632/oncotarget.3131), 2015-01-29
Supplement: oncotarget-06-7195-s001.pdf [file oncotarget-06-7195-s001.pdf]

## SUPPLEMENTARY FIGURES

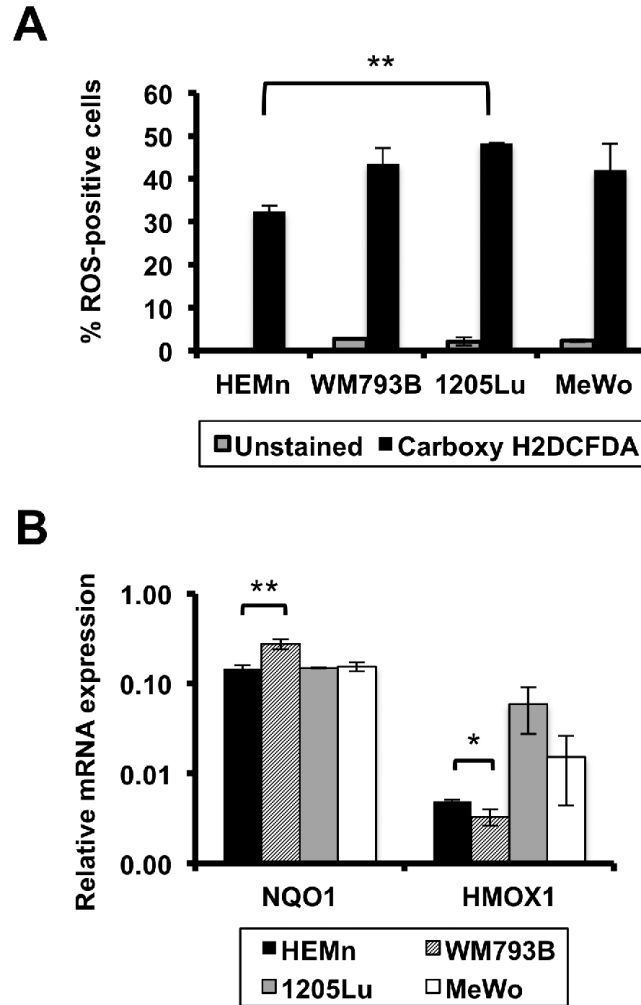

**Supplementary Figure 1: (A) Percentage of ROS-positive cells in HEMn melanocytes and WM793B, 1205Lu, and MeWo melanoma cells, determined by flow cytometry after incubation with carboxy-H<sub>2</sub>DCFDA. (B) Message level of oxidative stress-response genes *NQO1* and *HMOX1* by qPCR, calculated using  $\Delta CT = CT_{\text{target gene}} - CT_{\text{housekeeping gene}}$ . Significance was calculated by comparison to HEMn  $\Delta CT$  values. Significance values: \*indicates  $p \leq 0.05$ ; \*\*indicates  $p \leq 0.01$ .**

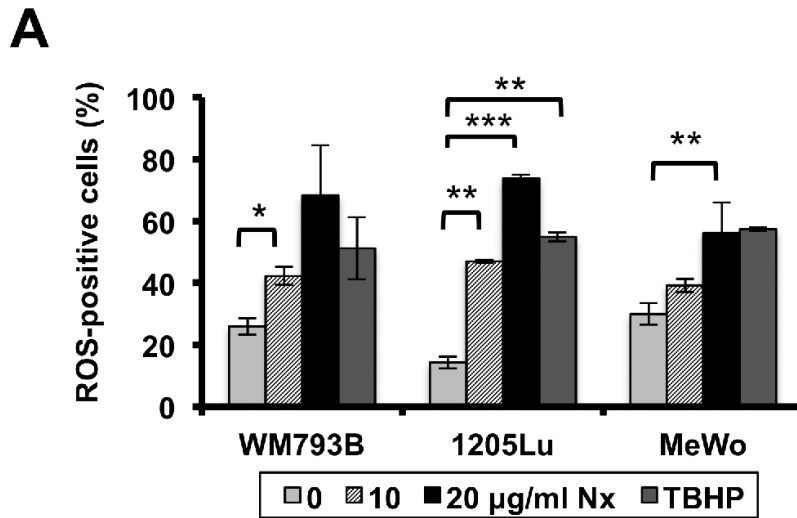

**Supplementary Figure 2: (A)** Quantification data of Figure 2A to show percentage of ROS-positive cells in field of view after vehicle, Nexrutine<sup>R</sup> (10, 20 µg/ml), or TBHP (for 3 h) using carboxy-H<sub>2</sub>DCFDA dye. A minimum of 3 independent experiments was performed. Significance values; \*indicates  $p \leq 0.05$ ; \*\*indicates  $p \leq 0.01$  and \*\*\*indicates  $p \leq 0.001$ .

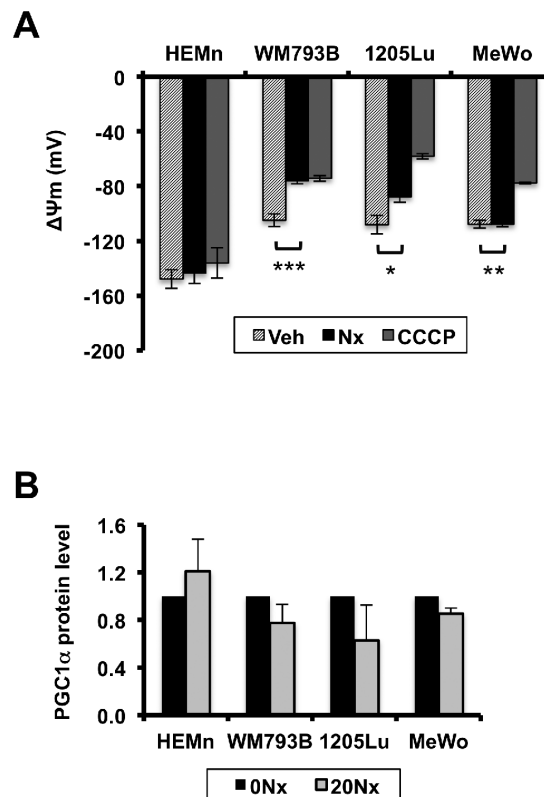

**Supplementary Figure 3: (A)** Quantification of mitochondrial membrane potential ( $\Delta\Psi_m$ ) changes was calculated from the experimental images of Nexrutine<sup>R</sup> and TMRM shown in figure 3C. A minimum of 50 mitochondria per image and 3 images from independent experiments were used for quantification and statistical analysis. Membrane potentials in millivolts (mV) were calculated using ImageJ Software and a plugin derived from the Nernst Equation. **(B)** Quantification of PGC1 $\alpha$  protein level (3 independent experiments) after Nexrutine<sup>R</sup> treatment (20 µg/ml; 18 h). Significance values; \*indicates  $p \leq 0.05$ ; \*\*indicates  $p \leq 0.01$  and \*\*\*indicates  $p \leq 0.001$ .

**A**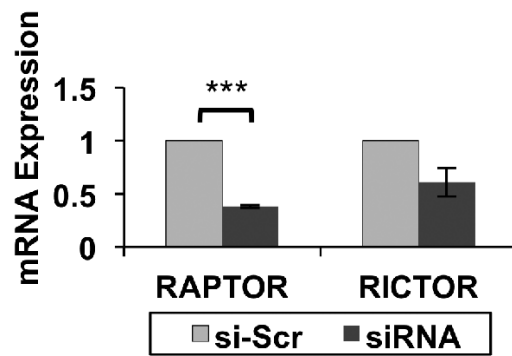**B**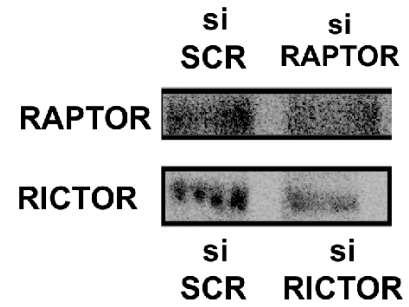

Supplementary Figure 4: (A) Validation of mRNA suppression by qPCR, 48 h after si-*RICTOR* and si-*RAPTOR* transient knockdown in 1205Lu cells. (B) Validation of protein level suppression by western blotting 48 h after si-*RICTOR* and si-*RAPTOR* transient knockdown in 1205Lu cells.
